# Supplementary material for: Cucurbit[10]uril binding of dinuclear platinum(II) and ruthenium(II) complexes: association/dissociation rates from seconds to hours
Source: Royal Society of Chemistry journal article supplement (doi:10.1039/b921172a), 2010-01-01
Supplement: b921172a.pdf [file b921172a.pdf]

## Supplementary Information

### Cucurbit[10]uril binding of dinuclear platinum(II) and ruthenium(II) complexes: association/dissociation rates from seconds to hours

Michelle J. Pisani,<sup>a</sup> Yunjie Zhao,<sup>a</sup> Lynne Wallace,<sup>a</sup> Clifford E. Woodward,<sup>a</sup>

F. Richard Keene,<sup>b\*</sup> Anthony I. Day<sup>a\*</sup> and J. Grant Collins<sup>a\*</sup>

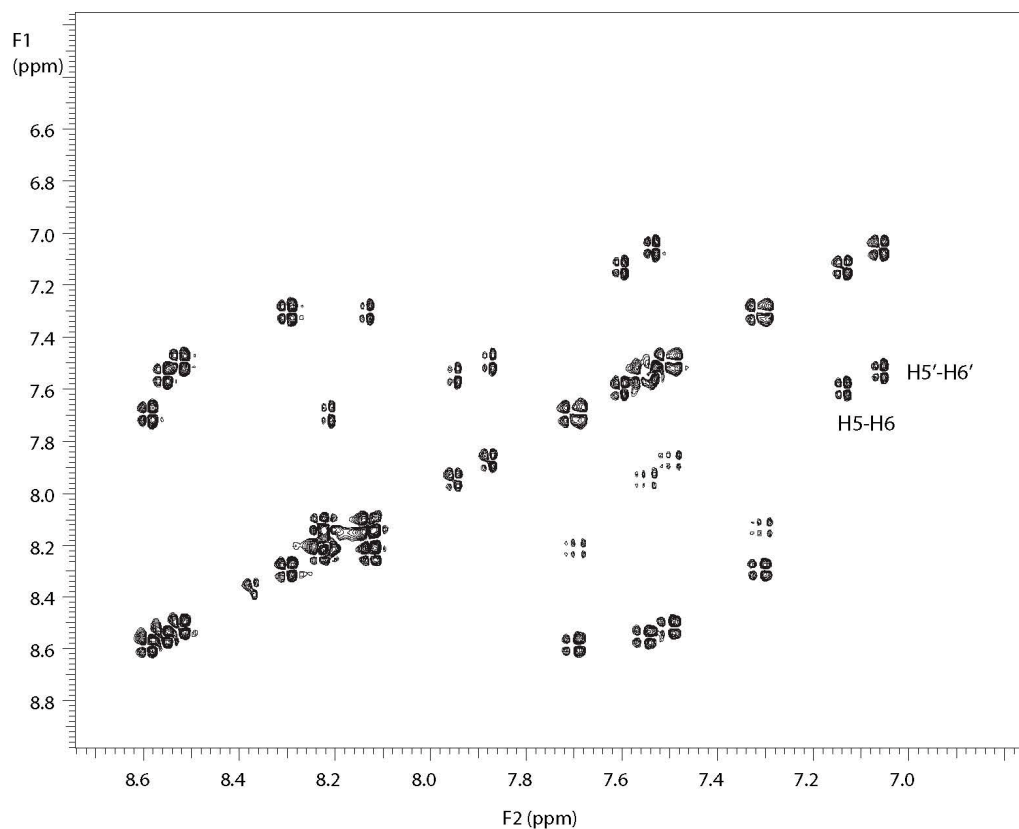

**Supplementary Information Figure 1** <sup>1</sup>H NMR DQFCOSY spectrum of Rubb<sub>5</sub> (1 mM). Important connectivities have been labelled.

## Supplementary Information

### Cucurbit[10]uril binding of dinuclear platinum(II) and ruthenium(II) complexes: association/dissociation rates from seconds to hours

Michelle J. Pisani,<sup>a</sup> Yunjie Zhao,<sup>a</sup> Lynne Wallace,<sup>a</sup> Clifford E. Woodward,<sup>a</sup>

F. Richard Keene,<sup>b\*</sup> Anthony I. Day<sup>a\*</sup> and J. Grant Collins<sup>a\*</sup>

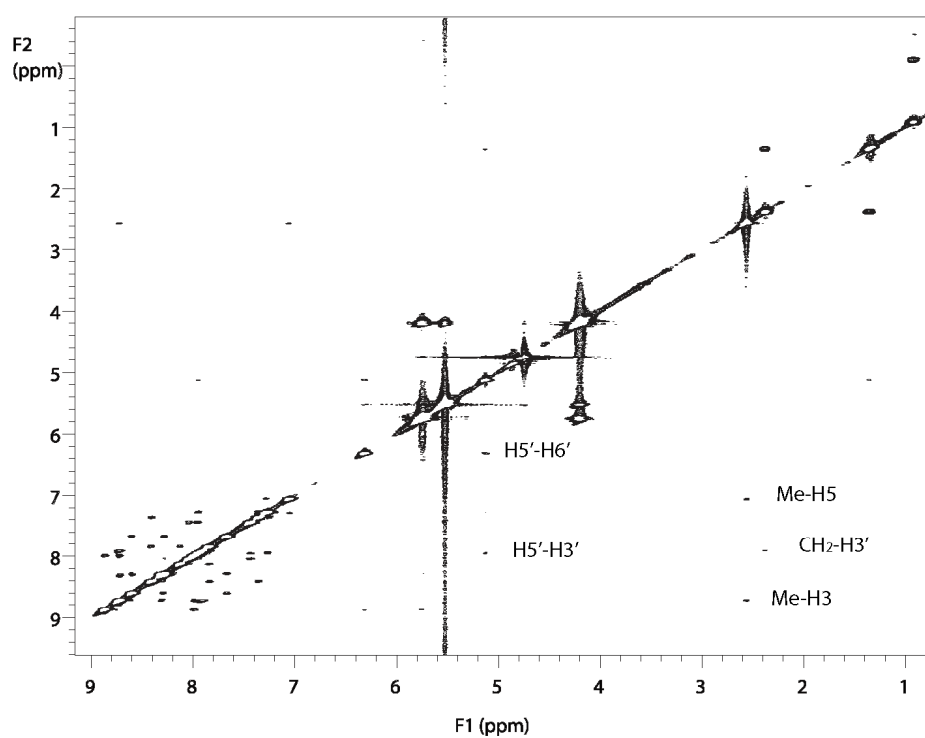

**Supplementary Information Figure 2**  $^1\text{H}$  NMR ROESY spectrum of  $\text{Rubb}_5^+$  +  $\text{Q}[10]$  (1 mM). Important connectivities have been labelled
